# Supplementary material for: Novel Cu(ii) complexes as DNA-destabilizing agents and their DNA nuclease activity
Source: Royal Society of Chemistry journal article supplement (doi:10.1039/d3dt02615a), 2023-01-01
Supplement: d3dt02615a1.pdf [file d3dt02615a1.pdf]

*Supporting Information*

**Novel Cu(II) Complexes as DNA-destabilizing Agents  
and Their DNA Nuclease Activity**

Hee Chang Kwon,<sup>a</sup> Da Hyun Lee,<sup>a</sup> Minyoung Yoon,<sup>b</sup> Saira Nayab,<sup>b,c</sup> Hyosun Lee,<sup>b,\*</sup> and Ji Hoon Han<sup>a,\*</sup>

<sup>a</sup>Department of Chemical and Biological Engineering, Andong National University, 1375 Gyeongdong-ro, Andong, Gyeongbuk, Korea, 36729

<sup>b</sup> Department of Chemistry and Green-Nano Materials Research Center, Kyungpook National University, 80 Daehakro, Bukgu, Daegu 41566, Republic of Korea

## Contents

---

|                   |                                                                                                                                                            |    |
|-------------------|------------------------------------------------------------------------------------------------------------------------------------------------------------|----|
| <b>FIGURE S1</b>  | FTIR spectra of $[L_A\text{Cu}(\text{NO}_3)_2]$ ( <b>Cu1</b> )                                                                                             | 2  |
| <b>FIGURE S2</b>  | FTIR spectra of $[L_B\text{Cu}(\text{NO}_3)_2]$ ( <b>Cu2</b> )                                                                                             | 3  |
| <b>FIGURE S3</b>  | FTIR spectra of $[L_C\text{Cu}(\mu\text{-Cl})\text{Cl}]_2$ ( <b>Cu4</b> )                                                                                  | 4  |
| <b>FIGURE S4</b>  | Elemental analysis of the synthesized complexes                                                                                                            | 5  |
| <b>FIGURE S5</b>  | ORTEP drawing of $[L_A\text{Cu}(\text{NO}_3)_2]$ ( <b>Cu1</b> )                                                                                            | 6  |
| <b>FIGURE S6</b>  | ORTEP drawing of $[L_B\text{Cu}(\text{NO}_3)_2]$ ( <b>Cu2</b> )                                                                                            | 7  |
| <b>FIGURE S7</b>  | ORTEP drawing of $[L_C\text{Cu}(\mu\text{-Cl})\text{Cl}]_2$ ( <b>Cu4</b> )                                                                                 | 8  |
| <b>FIGURE S8</b>  | Ball and stick models, space-filling models, and topographic steric maps of complexes                                                                      | 9  |
| <b>FIGURE S9</b>  | Determination of the extinction coefficient for Cu(II) complexes                                                                                           | 10 |
| <b>FIGURE S10</b> | CD spectra of CT-DNA in the absence and presence of the various Cu(II) complexes under high salt conditions                                                | 11 |
| <b>FIGURE S11</b> | Comparative analysis for fluorescence quenching of limited bound the various DNA binder                                                                    | 12 |
| <b>FIGURE S12</b> | Thermal denaturation curves of CT-DNA in the absence and presence of Cu complexes under high salt conditions                                               | 13 |
| <b>FIGURE S13</b> | Histogram of melting temperature of homogenous and alternative A-T and G-C oligomers in the absence and presence of various Cu(II) complexes               | 14 |
| <b>TABLE S1</b>   | Crystal data and structure refinement for Cu(II) complexes                                                                                                 | 15 |
| <b>TABLE S2</b>   | Relative amounts (%) of Forms (I), (II), and (III) in the presence of various concentrations (30 and 50 $\mu\text{M}$ ) of Cu(II) complexes with ascorbate | 16 |
| <b>TABLE S3</b>   | Effect of various ROS scavengers on scDNA cleavage                                                                                                         | 17 |

---

FIGURE S1.

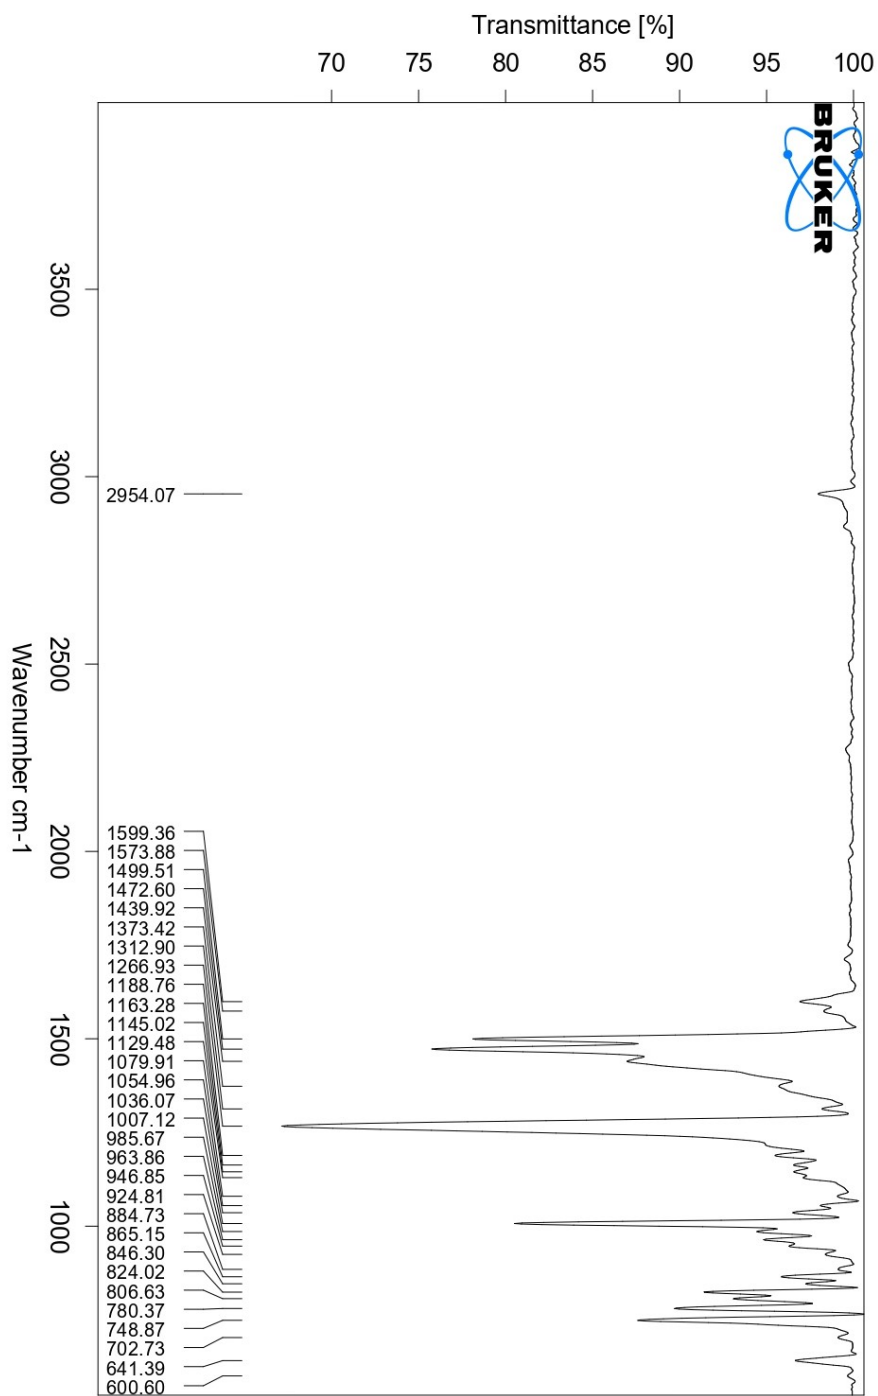

D:\JG\연구실\22\_10\_07\_lab\_com\_backup\JG\PHD\_courses)\@@@연구데이터+관련자료\@@DATA2\_IR\20220905\_IR\JG-7-60.0 JG-7-60 IR 2022-09-05

Figure S2. F

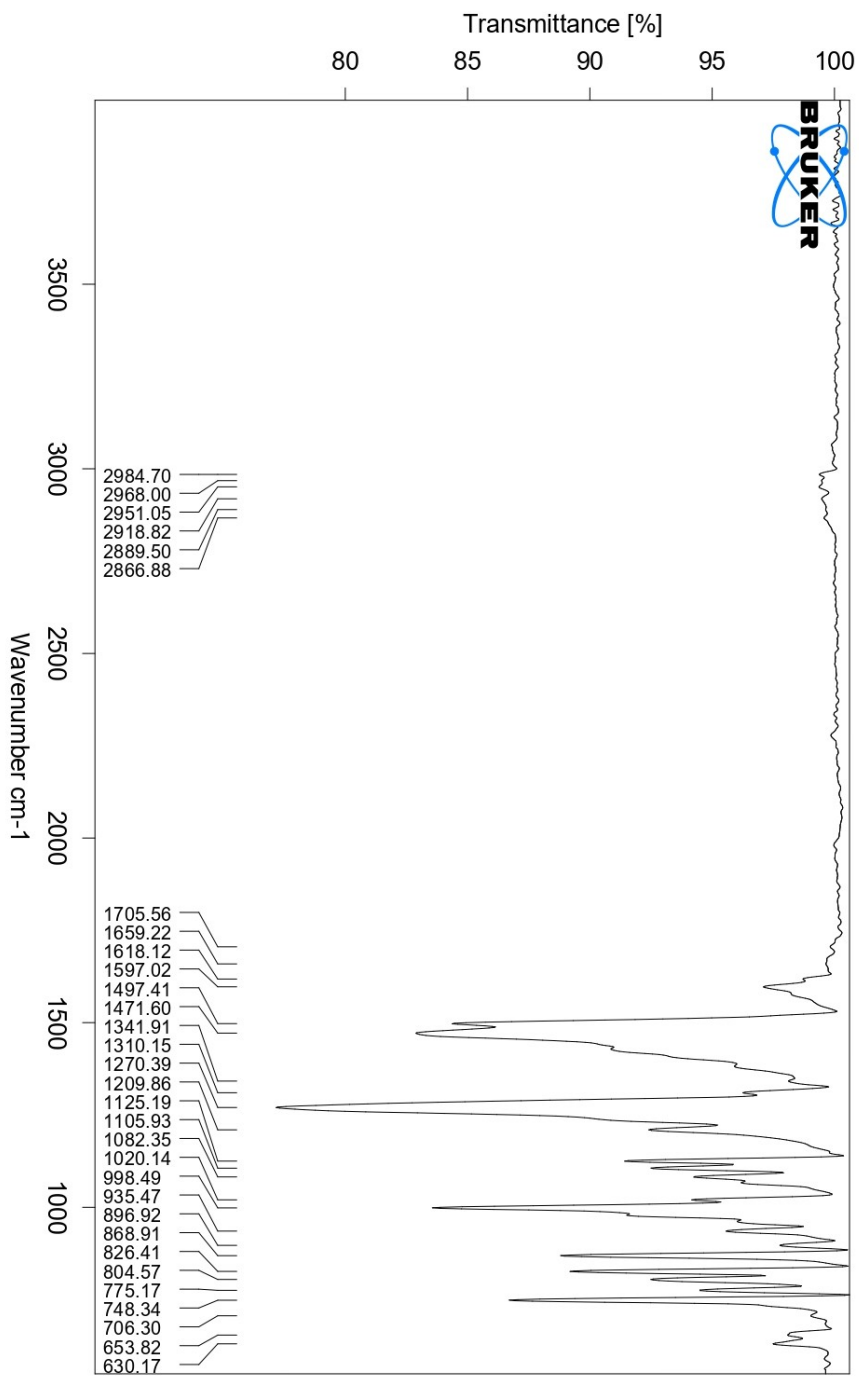

D:\JUG\연구실\22.10.07\_lab\_com\_backup\JUG(PHD\_courses)\@@@연구데이터+관련자료\@@@DATA\2\_IR\20220905\_IR\UG-7-61\_1.0 JG-7-61 2022-09-05

Figure S3. FTIR spectra of  $[L_C Cu(\mu-Cl)Cl]_2 (Cu_4)$ .

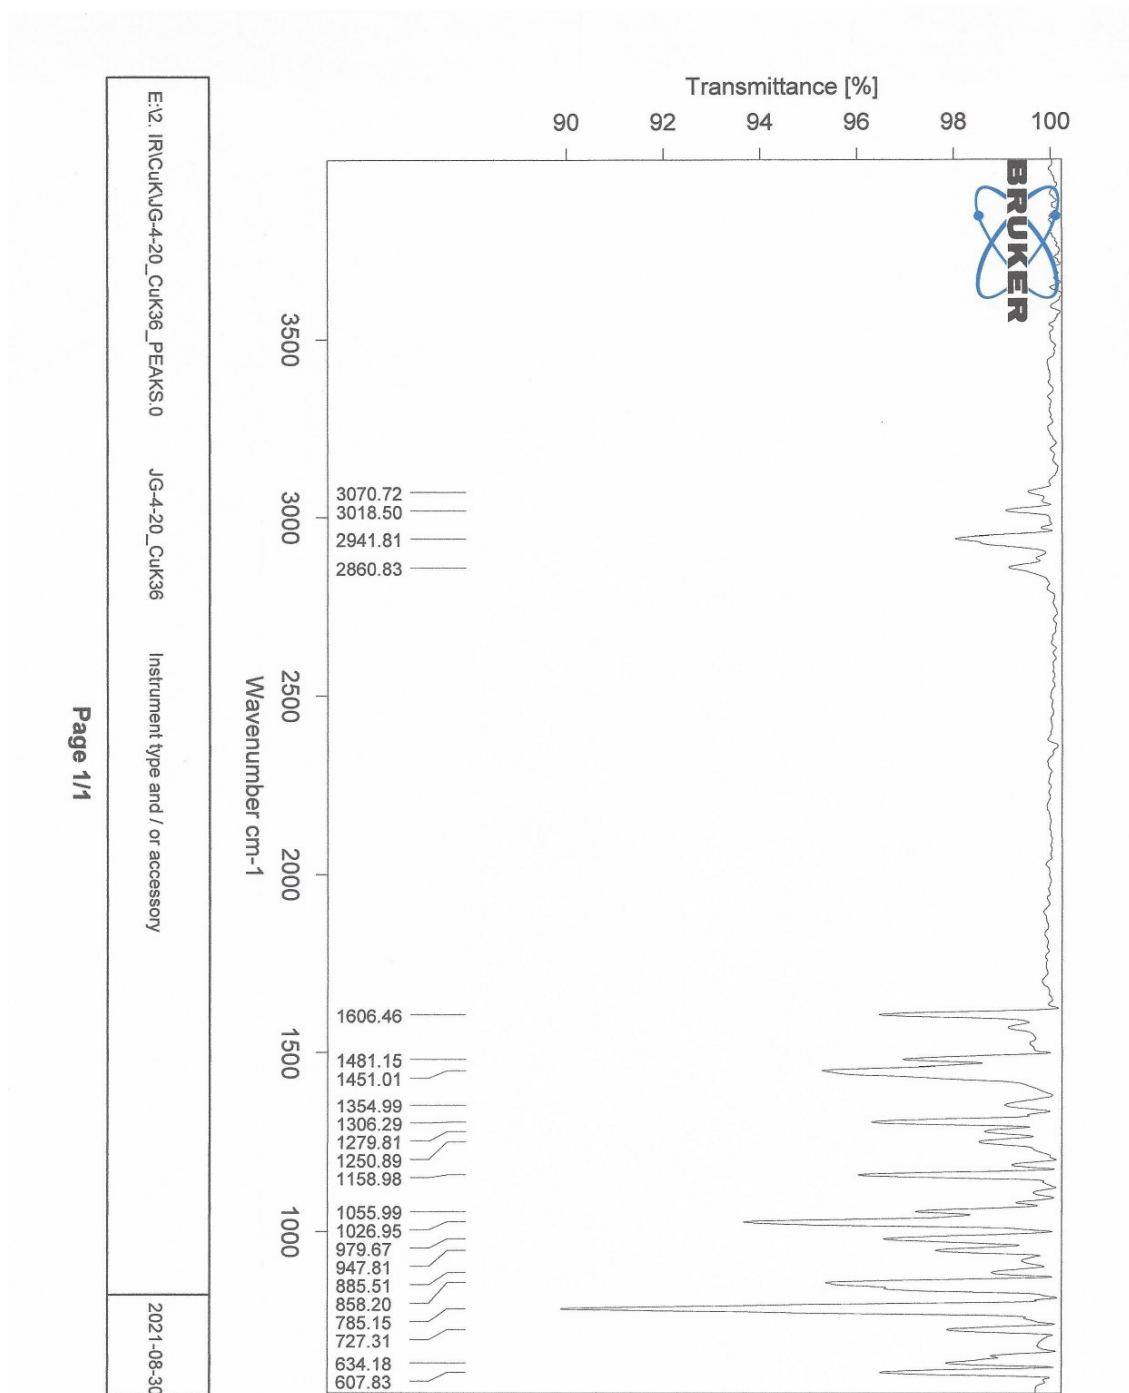

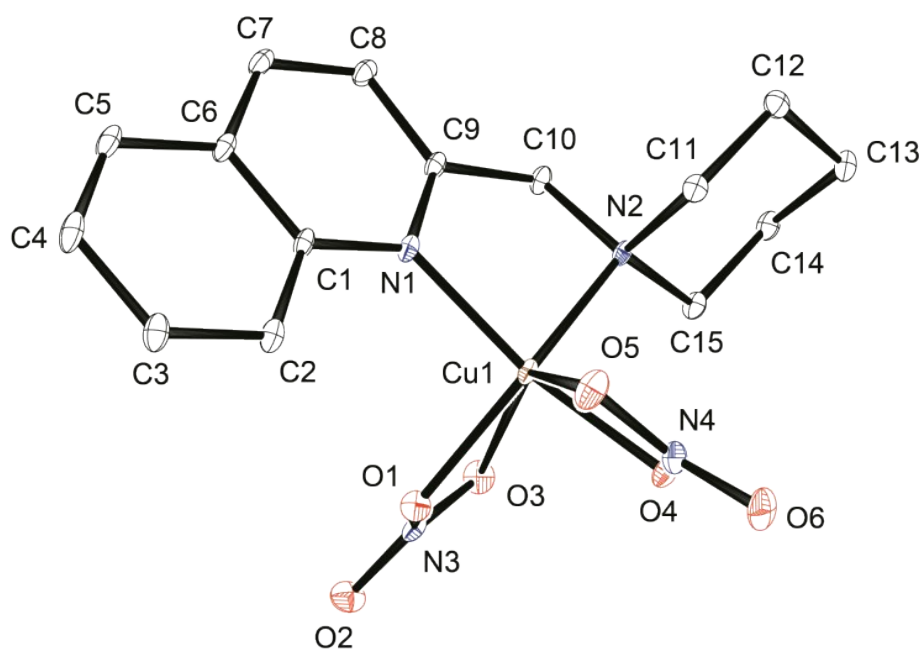

**Figure S4.** ORTEP drawing of  $[\text{L}_A\text{Cu}(\text{NO}_3)_2]$  (**Cu1**) with thermal ellipsoids at 30% probability. All hydrogen atoms are omitted for clarity.

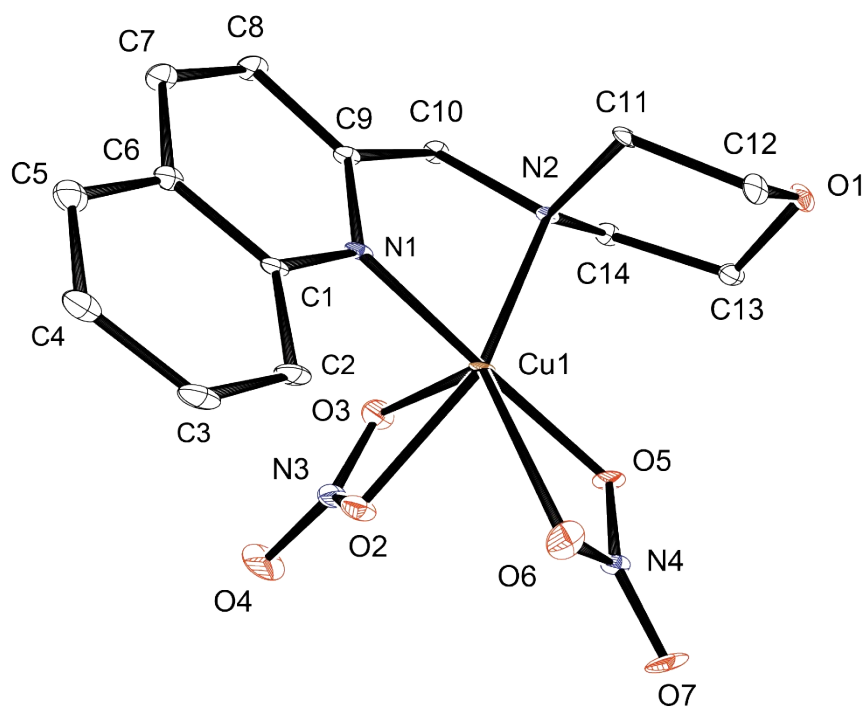

**Figure S5.** ORTEP drawing of [L<sub>B</sub>Cu(NO<sub>3</sub>)<sub>2</sub>] (Cu<sub>2</sub>) with thermal ellipsoids at 50% probability. All hydrogen atoms are omitted for clarity.

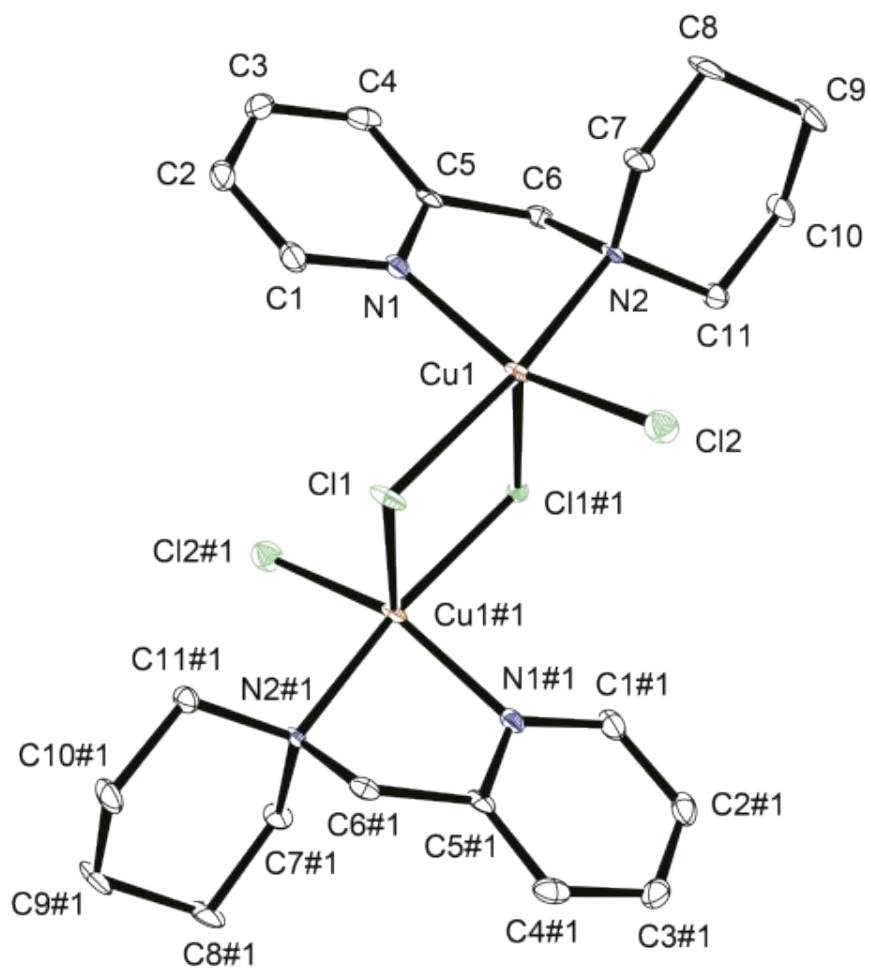

**Figure S6.** ORTEP drawing of  $[L_cCu(\mu-Cl)Cl]_2$  (**Cu4**) with thermal ellipsoids at 50% probability. All hydrogen atoms are omitted for clarity.



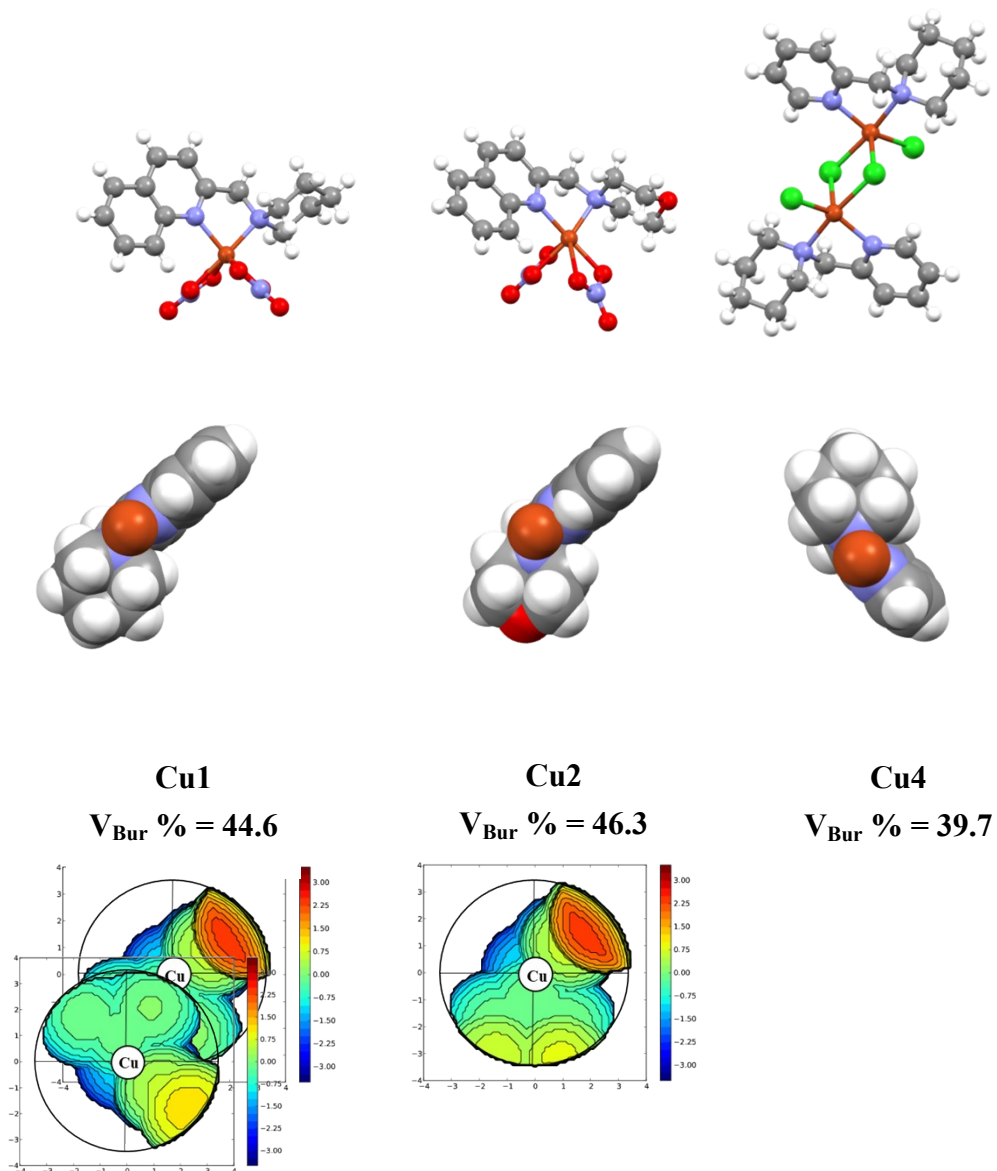

**Figure S7.** Ball and stick models, space-filling models, and topographic steric maps of complexes

Figure S8. Elemental analysis of the synthesized complexes.

| Eager 300 Summarize Results         |             |             |             |          |
|-------------------------------------|-------------|-------------|-------------|----------|
| Date : 2022-09-08 at 08:49:35       |             |             |             |          |
| Method Name : NCHS                  |             |             |             |          |
| Method Filename : EA-A_20220907.mth |             |             |             |          |
| Group No : 1                        | Element %   |             |             |          |
| Sample Name                         | Nitrogen%   | Carbon%     | Hydrogen%   | Sulphur% |
| JG-7-60                             | 13.27818871 | 43.98248672 | 4.334647655 | 0        |
| JG-7-60                             | 13.66265583 | 43.95064926 | 4.317540169 | 0        |
| 2 Sample(s) in Group No : 1         |             |             |             |          |
| Component Name                      | Average     |             |             |          |
| Nitrogen%                           | 13.47042227 |             |             |          |
| Carbon%                             | 43.96656799 |             |             |          |
| Hydrogen%                           | 4.326093912 |             |             |          |
| Sulphur%                            | 0           |             |             |          |
| EagerSmart Summarize Results        |             |             |             |          |
| Date : 2022-10-07 at 09:45:11       |             |             |             |          |
| Method Name : NCHS                  |             |             |             |          |
| Method Filename : EA-D_20221006.mth |             |             |             |          |
| Group No : 1                        | Element %   |             |             |          |
| Sample Name                         | Nitrogen    | Carbon      | Hydrogen    | Sulphur  |
| JG-7-61                             | 13.89069843 | 40.90753937 | 3.900032043 | 0        |
| JG-7-61                             | 13.78213024 | 40.63606262 | 3.858319521 | 0        |
| 2 Sample(s) in Group No : 1         |             |             |             |          |
| Component Name                      | Average     |             |             |          |
| Nitrogen                            | 13.83641434 |             |             |          |
| Carbon                              | 40.77180099 |             |             |          |
| Hydrogen                            | 3.879175782 |             |             |          |
| Sulphur                             | 0           |             |             |          |
| Eager 300 Summarize Results         |             |             |             |          |
| Date : 2022-02-03 at 08:42:29       |             |             |             |          |
| Method Name : NCHS                  |             |             |             |          |
| Method Filename : EA-A_20220128.mth |             |             |             |          |
| Group No : 1                        | Element %   |             |             |          |
| Sample Name                         | Nitrogen%   | Carbon%     | Hydrogen%   | Sulphur% |
| JG-5-27                             | 8.92653656  | 42.37840271 | 5.389563084 | 0        |
| JG-5-27                             | 8.866337776 | 42.49068832 | 5.387815952 | 0        |
| 2 Sample(s) in Group No : 1         |             |             |             |          |
| Component Name                      | Average     |             |             |          |
| Nitrogen%                           | 8.896437168 |             |             |          |
| Carbon%                             | 42.43454552 |             |             |          |
| Hydrogen%                           | 5.388689518 |             |             |          |
| Sulphur%                            | 0           |             |             |          |

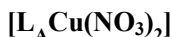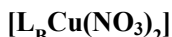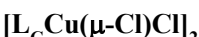

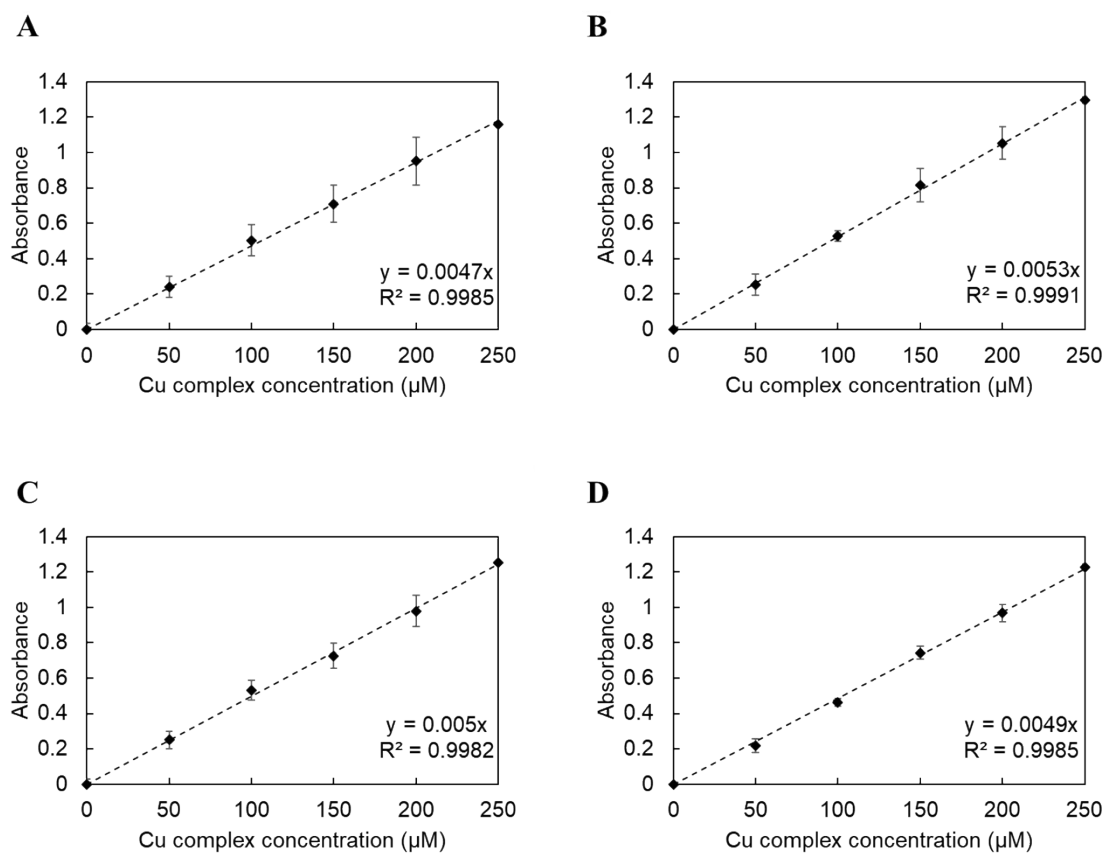

**Figure S9.** Determination of the extinction coefficient for Cu complexes: Cu1(A), Cu2(B), Cu3(C), and Cu4(D).

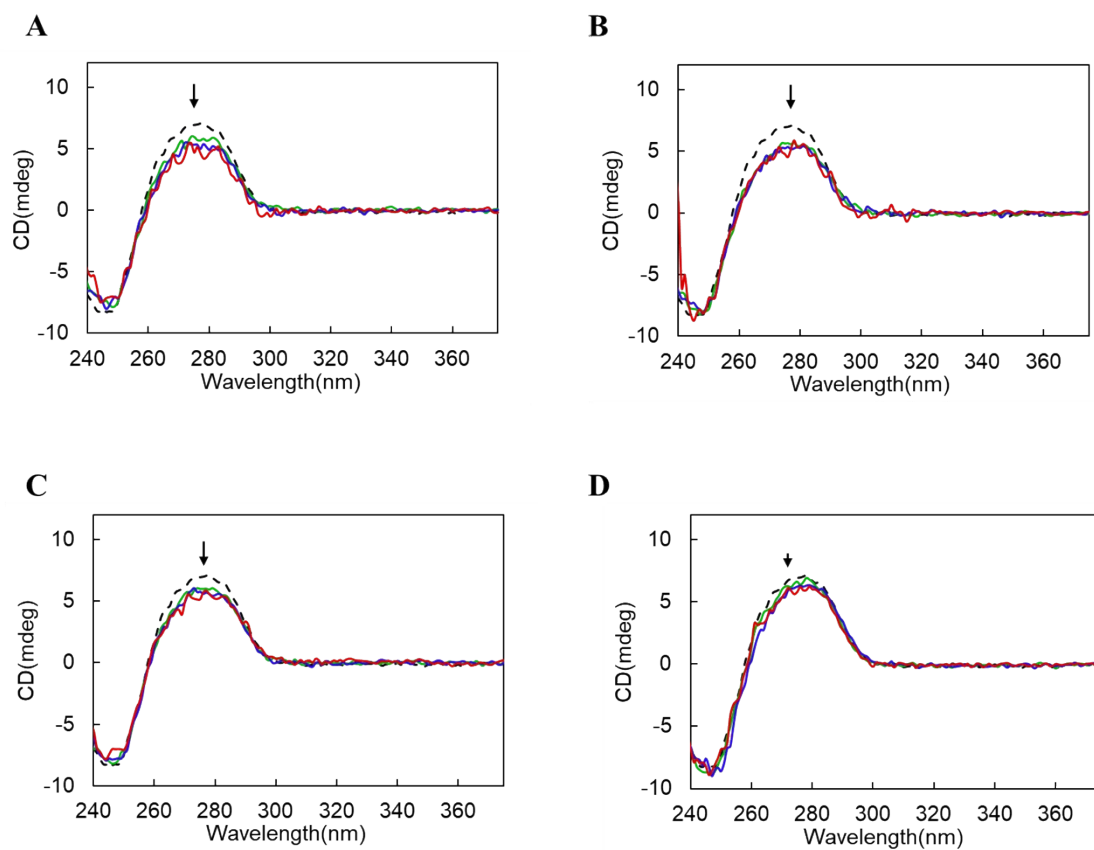

**Figure S10.** CD spectra of CT-DNA in the absence and presence of the various Cu complexes under high salt conditions: Cu1 (A), Cu2 (B), Cu3 (C), and Cu4 (D), respectively. [CT-DNA] = 100  $\mu$ M and [Cu complex] = 0 (black dashed line), 50 (green line), 100 (blue line), and 150  $\mu$ M (red line). All samples contain 5 mM cacodylate buffer (pH 7.0) and 100 mM NaCl.

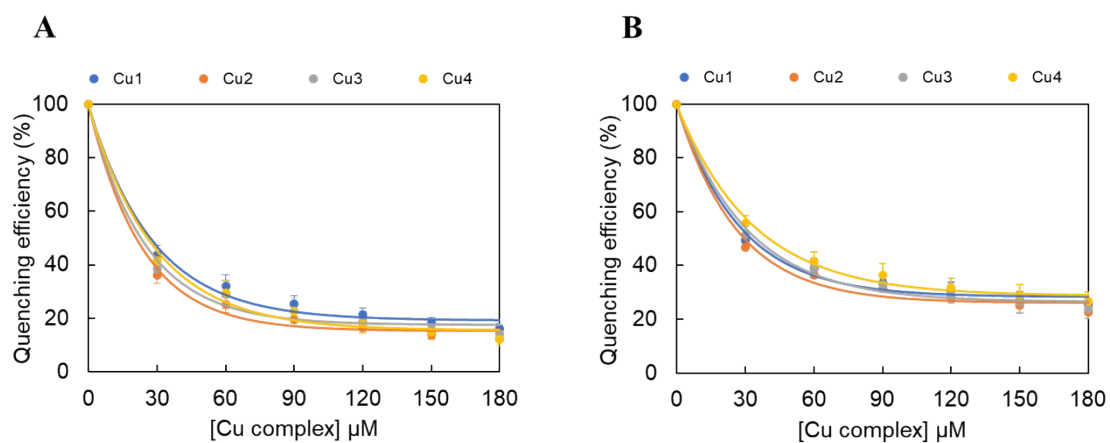

**Figure S11.** Comparative analysis for fluorescence quenching of limited bound the various DNA binder, EtBr (A) and Hoechst 33258 (B), at ratio = 0.1, by the addition of Cu1 (blue dot), Cu2 (orange dot), Cu3 (gray dot), and Cu4 (yellow dot). All data show the average value with an error bar after the experiment in duplicate. All samples contain 5 mM cacodylate buffer (pH 7.0) and 10 mM NaCl.

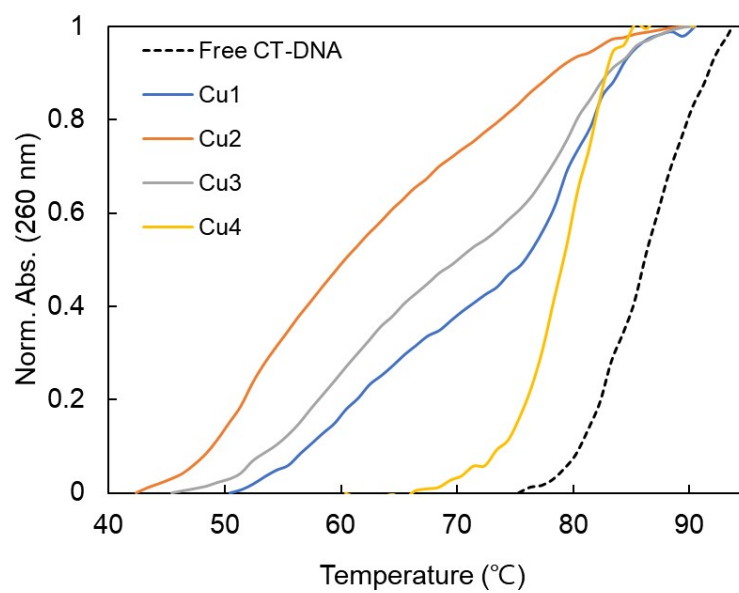

**Figure S12.** Thermal denaturation curves of CT-DNA in the absence and presence of Cu complexes, Cu1(blue line), Cu2(orange line), Cu3(gray line) and Cu4 (yellow line). [CT-DNA] = 50  $\mu$ M and [Cu complex] = 100  $\mu$ M. All samples contain 5 mM cacodylate buffer (pH 7.0) and 100 mM NaCl.

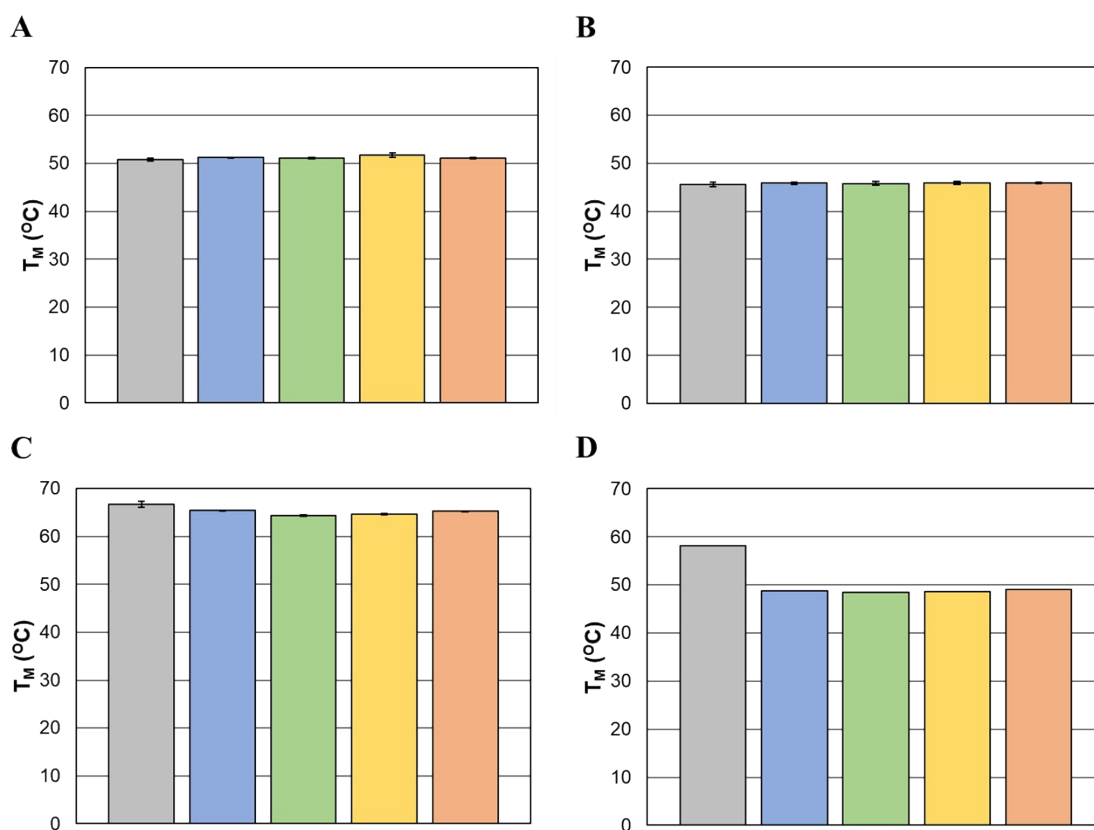

**Figure S13.** Histogram of melting temperature of homogenous and alternative A-T and G-C oligomers in the absence (gray) and presence of various Cu complexes, Cu1 (blue), Cu2 (green), Cu3 (yellow), and Cu4 (orange). 24mer of alternative A-T (A), 20mer of homogenous A-T (B), 15mer of alternative G-C (C), 15mer of homogenous G-C (D), were used. The ratio of [Cu complex] / [Oligomer] was 10.

**Table S1.** Crystal data and structure refinement for Cu(II) complexes.

|                                            | $[\text{L}_A\text{Cu}(\text{NO}_3)_2]$             | $[\text{L}_B\text{Cu}(\text{NO}_3)_2]$             | $[\text{L}_C\text{Cu}(\mu\text{-Cl})\text{Cl}]_2$            |
|--------------------------------------------|----------------------------------------------------|----------------------------------------------------|--------------------------------------------------------------|
| Empirical formula                          | $\text{C}_{15}\text{H}_{18}\text{CuN}_4\text{O}_6$ | $\text{C}_{14}\text{H}_{16}\text{CuN}_4\text{O}_7$ | $\text{C}_{22}\text{H}_{32}\text{Cl}_4\text{Cu}_2\text{N}_4$ |
| Formula weight                             | 413.87                                             | 415.85                                             | 621.39                                                       |
| Temperature (K)                            | 100(2)                                             | 100(2)                                             | 150(2)                                                       |
| Wavelength (Å)                             | 0.610                                              | 0.610                                              | 0.630                                                        |
| Crystal system                             | Monoclinic                                         | Triclinic                                          | Monoclinic                                                   |
| Space group                                | $P2_1/n$                                           | $P-1$                                              | $P2_1/c$                                                     |
| Unit cell dimensions                       |                                                    |                                                    |                                                              |
| $a$ (Å)                                    | 9.968(2)                                           | 7.1870(1)                                          | 10.682(2)                                                    |
| $b$ (Å)                                    | 7.9070(2)                                          | 8.2690(2)                                          | 7.1300(1)                                                    |
| $c$ (Å)                                    | 21.463(4)                                          | 14.574(3)                                          | 16.493(3)                                                    |
| $\alpha$ (°)                               | 90                                                 | 74.02(3)                                           | 90                                                           |
| $\beta$ (°)                                | 101.99(3)                                          | 89.47(3)                                           | 100.03(3)                                                    |
| $\gamma$ (°)                               | 99                                                 | 69.01(3)                                           | 90                                                           |
| Volume (Å <sup>3</sup> ), $Z$              | 1654.7(6), 4                                       | 773.6(3), 2                                        | 1236.9(4), 2                                                 |
| Density (calculated) (Mg/m <sup>3</sup> )  | 1.661                                              | 1.785                                              | 1.668                                                        |
| Absorption coefficient (mm <sup>-1</sup> ) | 0.901                                              | 0.967                                              | 1.553                                                        |
| F(000)                                     |                                                    |                                                    |                                                              |
| Crystal size (mm <sup>3</sup> )            | 852                                                | 426                                                | 636                                                          |
| Theta range for data collection            | $0.080 \times 0.075 \times 0.050$                  | $0.200 \times 0.080 \times 0.070$                  | $0.075 \times 0.035 \times 0.015$                            |
| Index ranges                               | 1.665 to 33.665°                                   | 2.333 to 33.652°                                   | 1.716 to 25.999°                                             |



|                                                  |                                             |                                             |                                             |
|--------------------------------------------------|---------------------------------------------|---------------------------------------------|---------------------------------------------|
| Reflections collected                            | $-16 \leq h \leq 16,$                       | $-12 \leq h \leq 12,$                       | $-14 \leq h \leq 14,$                       |
| Independent reflections                          | $-12 \leq k \leq 12,$                       | $-13 \leq k \leq 13,$                       | $-9 \leq k \leq 9,$                         |
| Completeness to theta                            | $-35 \leq l \leq 35$                        | $-22 \leq l \leq 23$                        | $-22 \leq l \leq 22$                        |
| Absorption correction                            | 27826                                       | 11409                                       | 12134                                       |
| Refinement method                                | 8692 [R(int) = 0.0625]                      | 7198 [R(int) = 0.0272]                      | 3481 [R(int) = 0.0996]                      |
| Data / restraints / parameters                   | 99.4 % (21.469°)                            | 95.1 % (21.469°)                            | 100.0 % (22.210°)                           |
| Goodness-of-fit on F <sup>2</sup>                | Empirical                                   | Empirical                                   | Empirical                                   |
| Final R indices [I > 2sigma(I)]                  | Full-matrix least-squares on F <sup>2</sup> | Full-matrix least-squares on F <sup>2</sup> | Full-matrix least-squares on F <sup>2</sup> |
| R indices (all data)                             | 8692 / 0 / 307                              | 7198 / 0 / 235                              | 3481 / 0 / 145                              |
| Largest diff. peak and hole (e.Å <sup>-3</sup> ) | 1.150                                       | 1.050                                       | 0.967                                       |
|                                                  | R <sub>1</sub> = 0.0476                     | R <sub>1</sub> = 0.0396                     | R <sub>1</sub> = 0.0415                     |
|                                                  | wR <sub>2</sub> = 0.1382                    | wR <sub>2</sub> = 0.1178                    | wR <sub>2</sub> = 0.0975                    |
|                                                  | R <sub>1</sub> = 0.0586                     | R <sub>1</sub> = 0.0417                     | R <sub>1</sub> = 0.0576                     |
|                                                  | wR <sub>2</sub> = 0.1433                    | wR <sub>2</sub> = 0.1191                    | wR <sub>2</sub> = 0.1016                    |
|                                                  | 1.042 and -1.847                            | 0.977 and -1.236                            | 1.012 and -1.030                            |

**Table S2.** Relative amounts (%) of Forms (I), (II), and (III) in the presence of various concentrations (30 and 50  $\mu\text{M}$ ) of Cu(II) complexes with ascorbate

|        | Concentration<br>( $\mu\text{M}$ ) | Form I (%)      | Form II (%)     | Form III (%)    |
|--------|------------------------------------|-----------------|-----------------|-----------------|
| sc DNA |                                    | $83.5 \pm 3.7$  | $16.5 \pm 3.7$  | 0               |
| Cu1    | 30                                 | $70.9 \pm 9.0$  | $29.1 \pm 9.0$  | 0               |
|        | 50                                 | $10.3 \pm 9.0$  | $56.4 \pm 48.9$ | $33.3 \pm 57.7$ |
| Cu2    | 30                                 | $10.8 \pm 9.3$  | $55.9 \pm 48.4$ | $33.3 \pm 57.7$ |
|        | 50                                 | 0               | 0               | 100             |
| Cu3    | 30                                 | $25.9 \pm 22.8$ | $40.7 \pm 35.5$ | $33.3 \pm 57.7$ |
|        | 50                                 | 0               | $24.9 \pm 43.2$ | $75.1 \pm 43.2$ |
| Cu4    | 30                                 | 0               | 0               | 100             |
|        | 50                                 | 0               | 0               | 100             |

**Table S3.** Effect of various ROS scavengers on *scDNA* cleavage<sup>a</sup>

| Scavengers       | Form I (%) | Form II (%) | Form III (%) |
|------------------|------------|-------------|--------------|
| sc DNA + Cu1     | 21.9±26.6  | 78.1±26.6   | 0            |
| Tiron            | 51.1±3.4   | 48.9±3.4    | 0            |
| Cu1 Sodium azide | 40.6±13.2  | 59.4±13.2   | 0            |
| Catalase         | 59.6±1.5   | 40.4±1.5    | 0            |
| DMSO             | 51.4±11.3  | 48.6±11.3   | 0            |
| sc DNA + Cu2     | 0          | 0           | 100          |
| Tiron            | 2.2±1.0    | 91.6±11.4   | 6.2±10.7     |
| Cu2 Sodium azide | 0          | 86.1±12.0   | 13.9±12.0    |
| Catalase         | 33.8±7.5   | 59.2±10.9   | 7.0±3.9      |
| DMSO             | 0          | 0           | 100          |
| sc DNA + Cu3     | 0          | 73.9±6.3    | 26.1±6.3     |
| Tiron            | 17.5±14.4  | 82.5±14.4   | 0            |
| Cu3 Sodium azide | 0          | 83.4±3.8    | 16.6±3.8     |
| Catalase         | 41.6±2.9   | 52.2±3.4    | 6.2±2.0      |
| DMSO             | 0          | 81.0±7.4    | 19.0±7.4     |
| sc DNA + Cu4     | 0          | 0           | 100          |
| Tiron            | 0          | 89.2±10.3   | 10.8±10.3    |
| Cu4 Sodium azide | 0          | 92.3±7.1    | 7.7±7.1      |
| Catalase         | 7.0±6.6    | 88.8±8.6    | 4.2±3.8      |
| DMSO             | 0          | 0           | 100          |

<sup>a</sup>Data were obtained from Figure 6 for the Cu(II) complex. [*scDNA*] = 100 μM, [ascorbate] = 100 μM, and [Cu(II) complex] = 50 μM
